# Supplementary figures and images for: Nivolumab in patients with relapsed or refractory peripheral T-cell lymphoma: modest activity and cases of hyperprogression
Source: PubMed Central journal article supplement — J Immunother Cancer. 2022 Jun 23;10(6):e004984. doi: 10.1136/jitc-2022-004984 (PMC9234908; doi:10.1136/jitc-2022-004984), 2022-06-23

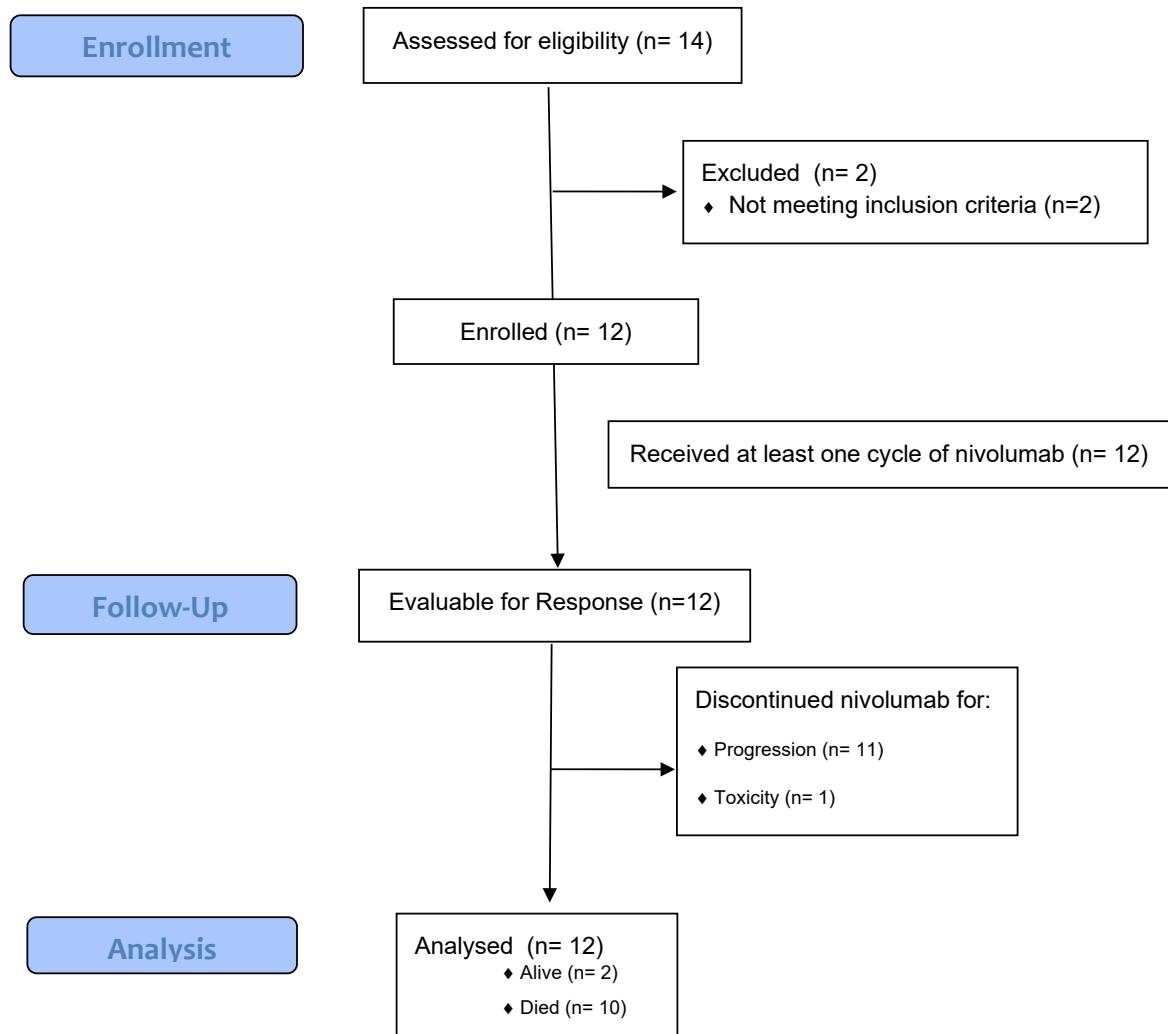

**Supplemental Figure 1: CONSORT Flow Diagram**

Supplement: jitc-2022-004984supp002.pdf [file jitc-2022-004984supp002.pdf]
